# Supplementary material for: Genomic selection analysis of morphological and adaptation traits in Chinese indigenous dog breeds
Source: Front Vet Sci. 2023 Sep 15;10:1237780. doi: 10.3389/fvets.2023.1237780 (PMC10540435; doi:10.3389/fvets.2023.1237780)
Supplement: Supplementary file 1 [file Table_1.xlsx]

## Sheet: Sheet1
Supplementary Table 1 Data of dog populations used in this study.
Breed	Origin	Type	Abb.	No.
Kazakh sheepdog	Kazakhstan	Sheepdog	ColKZ	5
Guangxi Biwei dog	Guangxi, China	Guard dog	GXBWQ	12
Chuandong hound	Sichuan, China	Hound	HCSSC	12
Liangshan dog	Sichuan, China	Hound	SCLSQ	12
Qingchuan dog	Sichuan, China	Hound	SCQCQ	12
Sharpei	Guangdong, China	Bull dog	SPGD	10
Tibetan Mastiff	Tibet, China	Guard dog	TCG	5
		Guard dog	TCHQ	7
		Guard dog	TCW	5
		Guard dog	TCY	4
Nyingchi dog	Nyingchi, China	Guard dog	TCLZ	12
Thin dogs	Shandong, China	Hound	ThCSD	10
	Shaanxi, China	Hound	ThCSX	12
Xiasi dog	Guizhou, China	Guard dog	XSGZ	12
